# Supplementary material for: Screen patterns and neurodevelopmental delay in preschoolers: an intelligent monitoring study
Source: Research Square preprint supplement (doi:10.21203/rs.3.rs-7571507/v1), 2025-09-22

Figure S1: Overarching framework of the screen data collection workflow.

a.
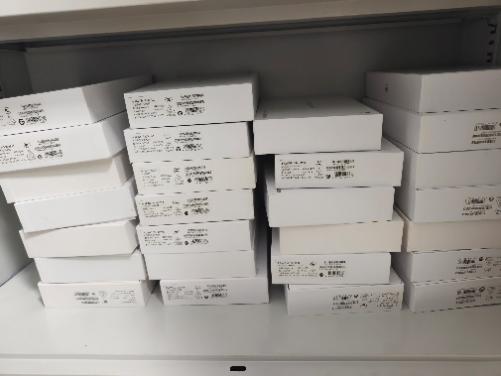


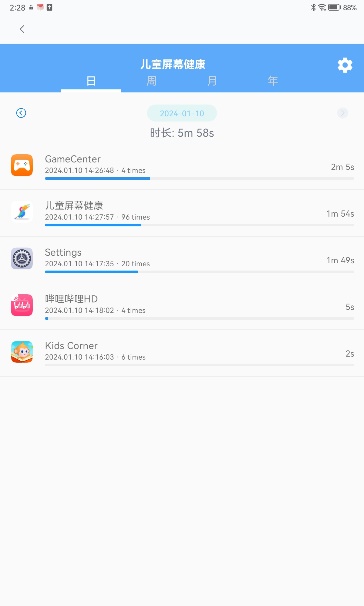

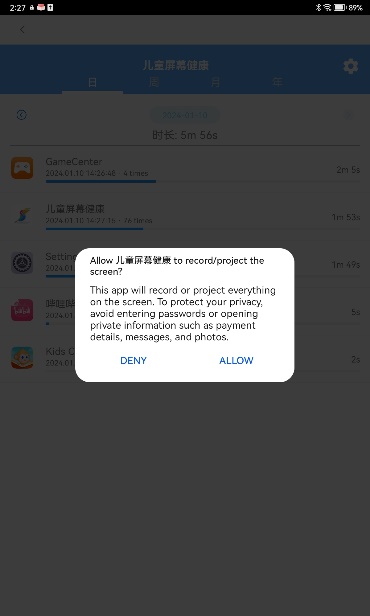


b (1). b (2).


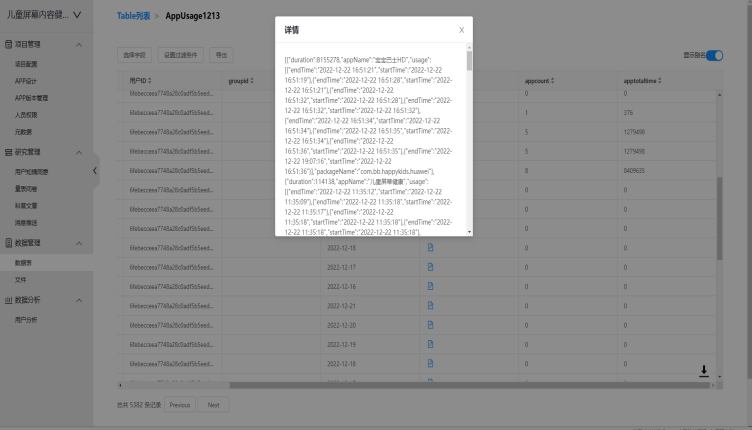
.
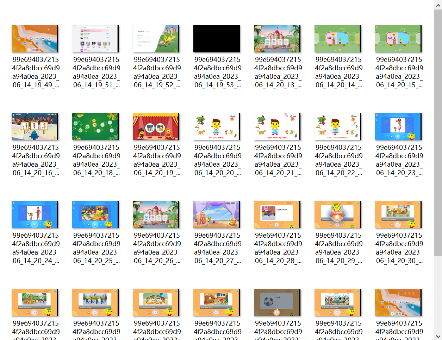


c (1) c (2)

Note:

1. Tablets of the same model (Huawei MatePad 10.4) are used as the equipment for data acquisition.

b (1). The front-end HSVC app, displaying the usage duration of various applications.

b (2). The screenshot capture feature of the HSVC app requires parental authorization to be enabled.

c (1). The screen usage data is stored on the Huawei Cloud server.

c (2). Researchers download the screenshots through the Huawei Research Platform.

Table S1: Descriptive characteristics of sample included in the analysis and sample with complete data.

| Characteristics | Complete data | | Included in Analysis | | | P-Value |
| --- | --- | --- | --- | --- | --- | --- |
| N | n(%) | N | | n(%) |  |
| Sex | 541 |  | 355 | |  |  |
| Male |  | 303(56.0) |  | | 204(57.5) | .67 |
| Female |  | 238(44.0) |  | | 151(42.5) |
| Age | 556 |  |  | |  |  |
| 4 |  | 215(38.7) | 355 | | 70(19.7) | <.001 |
| 5 |  | 183(32.9) |  | | 137(38.6) |
| 6 |  | 158(28.4) |  | | 148(41.7) |
| Mother's education | 547 |  | | 355 |  |  |
| ≤High school |  | 250(45.7) |  | | 164(46.2) | .96 |
| College or bachelor |  | 243(44.4) |  | | 158(44.5) |
| ≥Master |  | 54(9.87) |  | | 33 (9.30) |
| Annual family income | 547 |  | 355 | |  |  |
| ≤79，000 RMB |  | 59(10.8) |  | | 42(11.8) | .76 |
| 80，000-199，000RMB |  | 173(31.6) |  | | 117(33.0) |
| ≥200，000RMB |  | 315(57.6) |  | | 196(55.2) |
| Family structure | 547 |  | 355 | |  |  |
| Singleton |  | 282(51.6) |  | | 179(50.4) | .74 |
| More than one child |  | 265(48.4) |  | | 176(49.6) |
| Main caregiver | 547 |  | 355 | |  |  |
| Parents |  | 338(61.8) |  | | 219(61.7) | .98 |
| Grandparents or others |  | 209(38.2) |  | | 136(38.3) |

Figure S2: The elbow method of the K-means cluster analysis


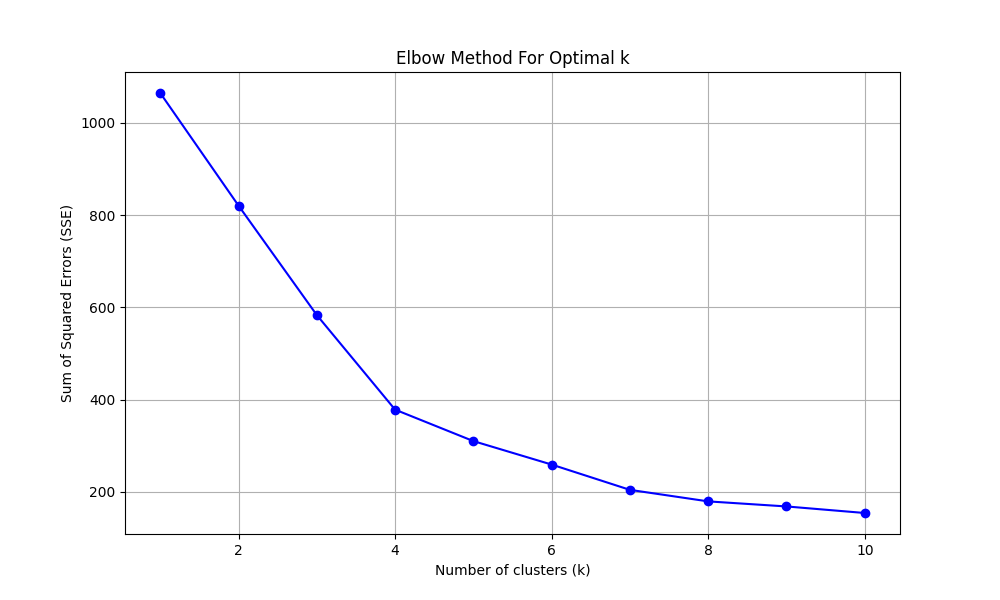

Supplement: Supplementary file 1 [file 237b90375dd89ba446a72542.docx]
